# Supplementary material for: An Area-Orientated Analysis of the Temporal Variation of Extreme Daily Rainfall in Great Britain and Australia
Source: MDPI journal article supplement (doi:10.3390/w15010128), 2022-12-29
Supplement: s1 [file s1]

Archive with 1 entries (1 files):
- water-2086479-supplementary.pdf
